# Supplementary material for: Experimental design of stencil-printed high-performance organic electrochemical transistors
Source: Royal Society of Chemistry journal article supplement (doi:10.1039/d3ma00888f), 2023-01-01
Supplement: d3ma00888f1.pdf [file d3ma00888f1.pdf]

## Experimental Design of Stencil-Printed High-Performance Organic Electrochemical Transistor

Amir Mohammad Ghafari <sup>1</sup>, Michele Catacchio <sup>2</sup>, Emil Rosqvist <sup>3</sup>, Axel Luukkonen <sup>1</sup>, Anni Eklund <sup>1</sup>, Kim Björkström <sup>1</sup>, Paolo Bollella <sup>4,5</sup>, Luisa Torsi <sup>1,4,5</sup>, Eleonora Macchia <sup>1,2,4</sup>, Ronald Österbacka <sup>1</sup>

<sup>1</sup> Physics and Center for Functional Materials, Faculty of Science and Engineering, Åbo Akademi University, Turku, 20500 Finland

<sup>2</sup> Dipartimento di Farmacia-Scienze del Farmaco, Università degli Studi di Bari “Aldo Moro”, Bari, 70125 Italy

<sup>3</sup> Physical Chemistry, Laboratory of Molecular Science and Engineering, Åbo Akademi University, Turku, 20500 Finland

<sup>4</sup> CSGI (Centre for Colloid and Surface Science), Bari, 70125 Italy

<sup>5</sup> Dipartimento di Chimica, Università degli Studi di Bari “Aldo Moro”, Bari, 70125 Italy

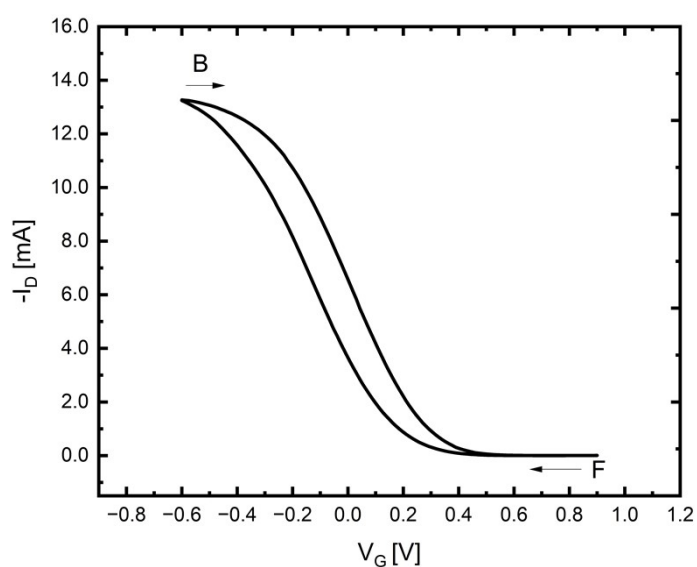

Figure S11 Transfer Curve of the optimized device (Forward/Backward)

Table. S1 The Experimental Plan reporting average and standard deviation of each response

| <b><i>L (mm)</i></b> | <b><i>T (C)</i></b> | <b><i>t (min)</i></b> | <b><i>on/off ratio</i></b> | <b><i>g<sub>m</sub> (mS)</i></b> | <b><i>V<sub>T</sub> (V)</i></b> |
|----------------------|---------------------|-----------------------|----------------------------|----------------------------------|---------------------------------|
| 1.5                  | 90                  | 10                    | 10100 ± 2000               | 29.0 ± 6.8                       | 0.27 ± 0.07                     |
| 2.5                  | 90                  | 10                    | 8050 ± 450                 | 29.1 ± 0.3                       | 0.37 ± 0.01                     |
| 1.5                  | 90                  | 120                   | 6900 ± 700                 | 30.0 ± 3.0                       | 0.46 ± 0.01                     |
| 2.5                  | 90                  | 120                   | 5600 ± 200                 | 26.9 ± 0.1                       | 0.46 ± 0.01                     |
| 2.0                  | 115                 | 65                    | 7550 ± 660                 | 31.0 ± 4.9                       | 0.50 ± 0.07                     |
| 1.5                  | 140                 | 10                    | 2800 ± 300                 | 29.8 ± 0.9                       | 0.62 ± 0.01                     |
| 2.5                  | 140                 | 10                    | 4500 ± 1100                | 28.6 ± 5.9                       | 0.56 ± 0.08                     |
| 1.5                  | 140                 | 120                   | 1270 ± 170                 | 24.8 ± 2.9                       | 0.65 ± 0.03                     |
| 2.5                  | 140                 | 120                   | 1970 ± 820                 | 26.9 ± 3.8                       | 0.53 ± 0.03                     |
| 2.0                  | 90                  | 10                    | 6800 ± 1900                | 22.5 ± 4.3                       | 0.26 ± 0.03                     |

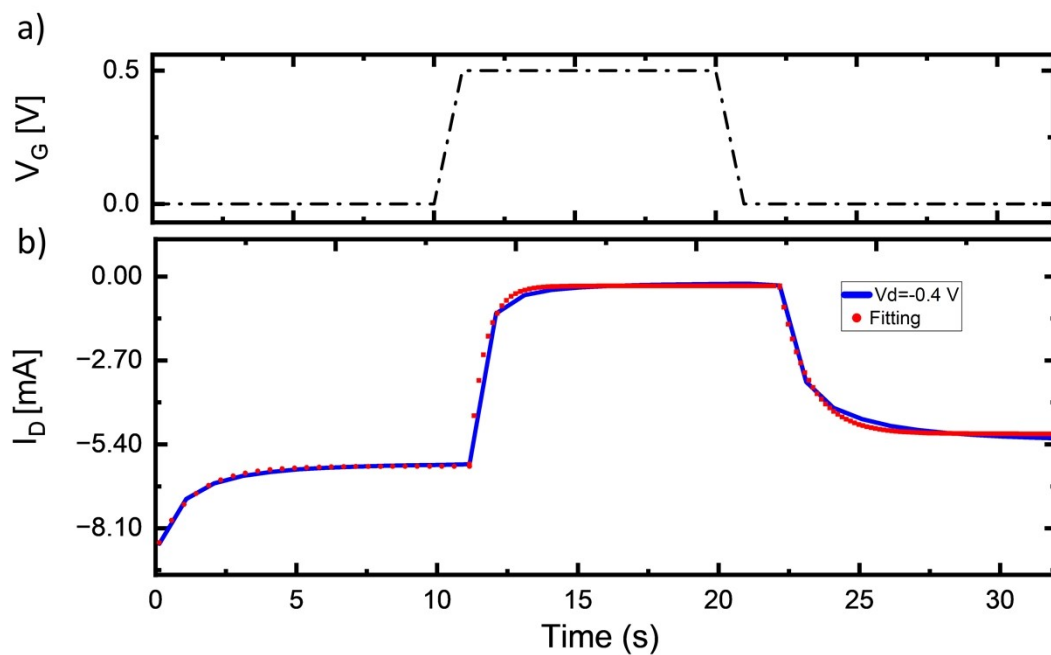

Figure S12 measured time response of an OECT in response to a square step of the gate voltage while  $V_D$  maintained constant (-0.4 V). a) a square  $V_G$  pulse of 0.5 V b) monotonic relaxation of  $I_D$  toward steady state fitted using Bernard's model and estimated time constant is 0.52s.

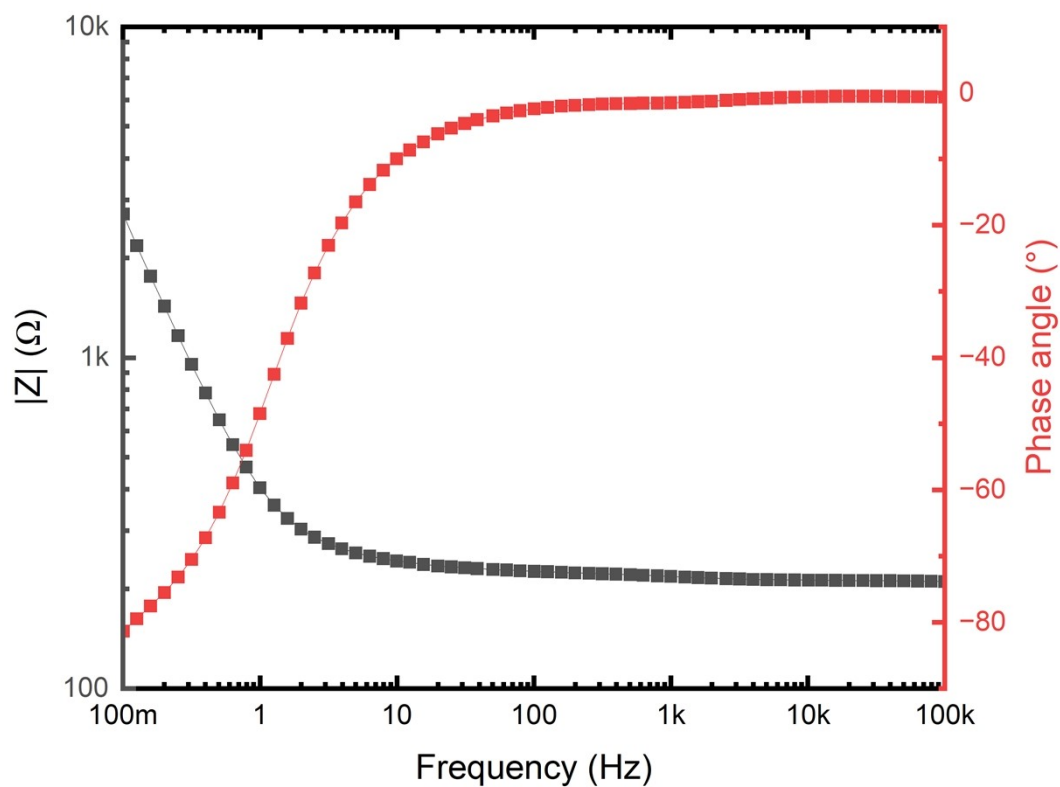

Figure S13 Bode plots of Electrochemical impedance spectroscopy (EIS) measurement (Counter electrode: platinum wire, working electrode: PEDOT:PSS channel, Reference electrode: Ag/AgCl wire). An equivalent circuit model (Randles) was fitted. The extracted value of raw capacitance is 0.5 mF and volumetric capacitance  $C^*$  is 4 F/cm<sup>3</sup>.

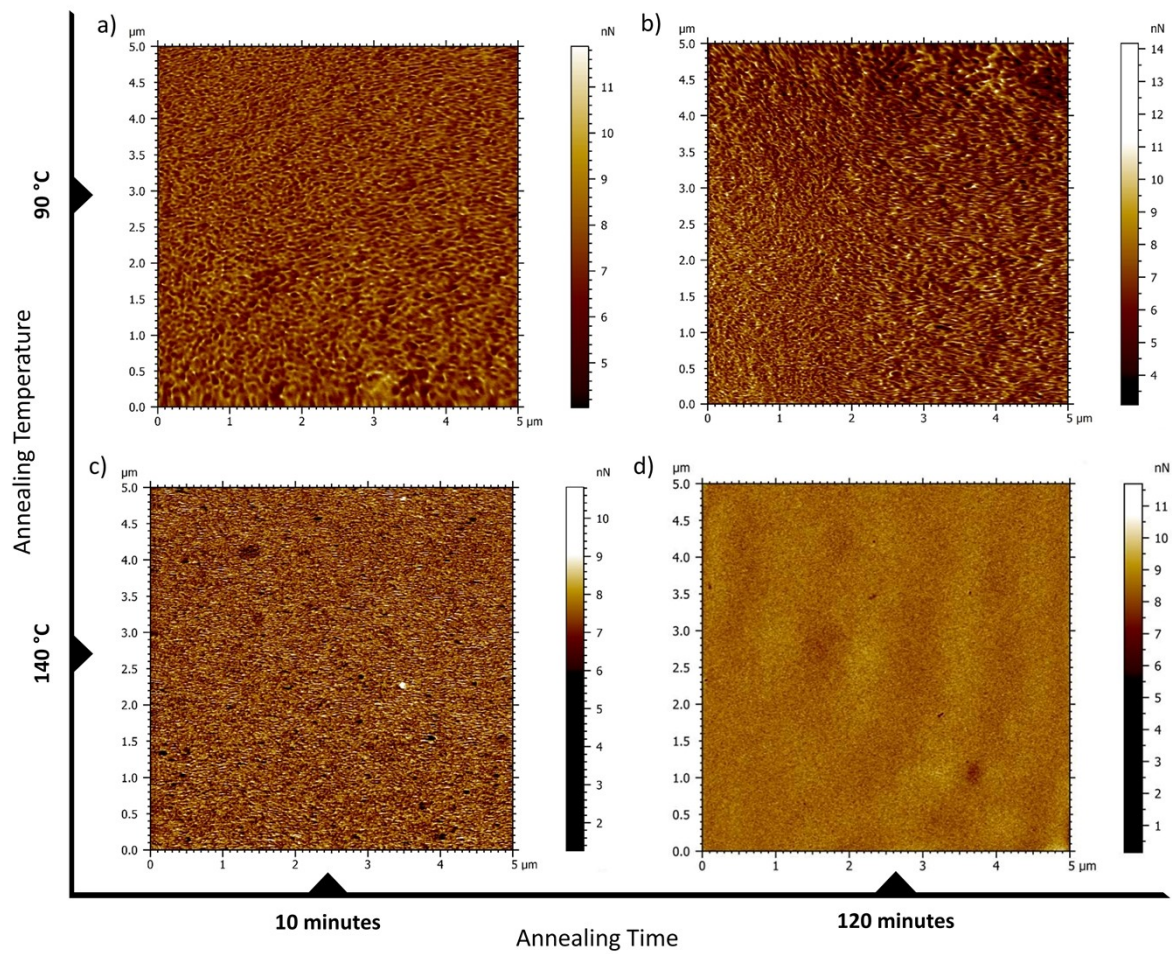

Figure SI4 Representative  $5 \mu\text{m} \times 5 \mu\text{m}$  adhesion maps of the channel region of 4 devices with  $L = 1.5 \text{ mm}$ , and in a)  $T = 90 \text{ }^\circ\text{C}$  and  $t = 10 \text{ minutes}$ , b)  $T = 90 \text{ }^\circ\text{C}$  and  $t = 120 \text{ minutes}$ , c)  $T = 140 \text{ }^\circ\text{C}$  and  $t = 10 \text{ minutes}$ , d)  $T = 140 \text{ }^\circ\text{C}$  and  $t = 120 \text{ minutes}$ .

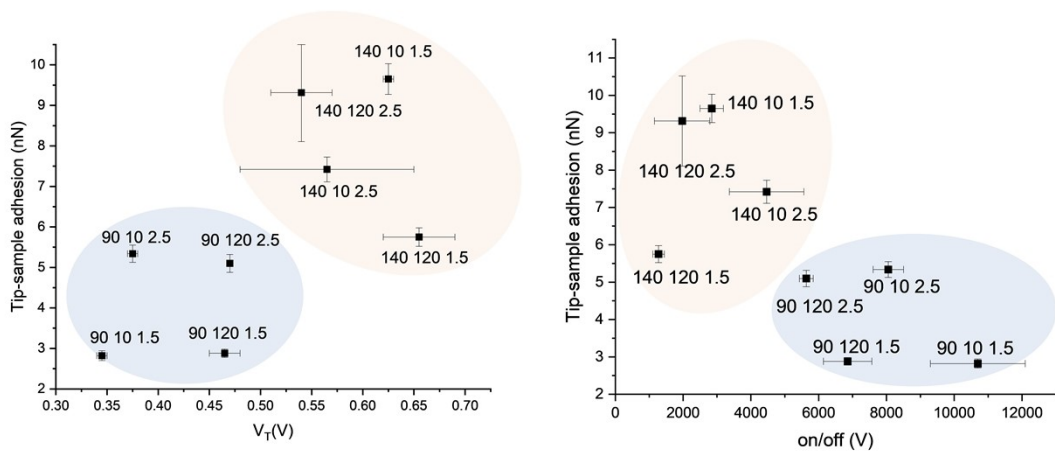

Figure SI5 The tip-surface adhesion of the OECTs measured with AFM plotted versus the on/off ratio (left) and the  $V_T$  (right). Blue is  $90 \text{ }^\circ\text{C}$ , pink is  $140 \text{ }^\circ\text{C}$ .
